# Supplementary material for: Doxorubicin drug delivery using an electrospun nanofiber membrane of chitosan–polycaprolactone with metal–organic framework: Box–Behnken optimization, anticancer treatment, and antimicrobial activity
Source: Royal Society of Chemistry journal article supplement (doi:10.1039/d5ra07539d), 2025-01-01
Supplement: d5ra07539d1.pdf [file d5ra07539d1.pdf]

**Doxorubicin drug delivery using an electrospun nanofiber membrane of chitosan–polycaprolactone with metal-organic framework: Box-Behnken optimization, anticancer treatment, and antimicrobial activity**

Table S1. Chemical name, formula, and company.

| Chemical name                    | Formula                  | Company                    |
|----------------------------------|--------------------------|----------------------------|
| Chitosan                         | $C_{56}H_{103}N_9O_3$    | Sigma-Aldrich, Germany     |
| Polycaprolactone                 | $(C_6H_{10}O_2)_n$       | Sigma-Aldrich, Germany     |
| Lanthanum nitrate hexahydrate    | $La(NO_3)_3 \cdot 6H_2O$ | Sigma-Aldrich, Germany     |
| benzene-1,3,5-tricarboxylic acid | $C_6H_3(CO_2H)_3$        | Sigma-Aldrich, Germany     |
| Methanol                         | $CH_3OH$                 | LOBA CHEMIE PVT.LTD, India |
| Ethanol                          | $C_2H_6O$                | Sigma-Aldrich, Germany     |
| Sodium hydroxide (99%, AR)       | $NaOH$                   | Chimmed, Russia            |
| Hydrochloric acid (37%, AR)      | $HCl$                    | LOBA CHEMIE PVT.LTD, India |

Table S2. Instruments and equipments.

| Test name                        | Abbreviation | Instrument name                                                                     | Company                                    | Illustration                                                                                                                                                                                                                         |
|----------------------------------|--------------|-------------------------------------------------------------------------------------|--------------------------------------------|--------------------------------------------------------------------------------------------------------------------------------------------------------------------------------------------------------------------------------------|
| Fourier transformer infrared     | FT-IR        | A Nicolet IS10 Fourier transform infrared (FTIR) spectrometer                       | Thermo Fisher Scientific, Waltham, MA, USA | equipped with an attenuated total reflectance accessory and which ran in the 4000-400 $\text{cm}^{-1}$ range was used to gather FTIR spectra                                                                                         |
| Powered X-ray diffraction        | PXRD         | Siemens diffractometer (model D500, Germany)                                        | Germany                                    | patterns were captured from powder samples through the use of a Siemens diffractometer (model D500, Germany) that was fitted with a Cu-K radiation source (wavelength 1.54 Angstroms ( $\text{\AA}$ )) operating at 30 kV and 20 mA. |
| Scanning Electron Microscope     | SEM          | (JSM-6510LV, JEOL Ltd., Tokyo, Japan)                                               | JEOL Ltd., Tokyo, Japan                    | The morphology of the investigated sorbents was analyzed with the use of a scanning electron microscope                                                                                                                              |
| X-ray photoelectron spectroscopy | XPS          | K-ALPHA (Thermo Fisher Scientific, USA)                                             | Thermo Fisher Scientific, USA              | Used for determination the elemental analysis for the compound                                                                                                                                                                       |
| Braunnar Emmet Teller            | BET          | Quantachrome Instruments, Anton Paar Inc., Quanta Tec, Inc., Boynton Beach, FL, USA | Quanta Tec, Inc., Boynton Beach, FL, USA   | was utilised for surface and pore analysis (Brunauer Emmett-Teller (BET) surface area, porous volume, and pore size), and NovaWin Software (v11.0) was used for data interpretation.                                                 |

|                              |                      |                                                                             |                                                 |  |                                                                                                                                                                                                            |
|------------------------------|----------------------|-----------------------------------------------------------------------------|-------------------------------------------------|--|------------------------------------------------------------------------------------------------------------------------------------------------------------------------------------------------------------|
|                              |                      | USA                                                                         |                                                 |  | The BET surface area of material adsorbents was obtained by the application of nitrogen adsorption-desorption isotherms at 77K through the use of a specific analyser (Quadratorb-EVO, Quantachrome, USA). |
| UV-visible spectrophotometer | UV spectrophotometer | Perkin-Elmer AA800 spectrophotometer<br>Double beam, with 1 cm cell length. |                                                 |  | Measuring the concentration of the adsorbate solution via using Beer-Lambert law                                                                                                                           |
| Energy Dispersive X-ray      | EDX                  | Leo1430VP microscope                                                        | Carl Zeiss AG,<br>Jena, Germany                 |  | Elemental analysis of the material                                                                                                                                                                         |
| pH meter                     | pH                   | HANNA (model 211)                                                           | USA                                             |  | Measuring the acidity or basicity of the solution                                                                                                                                                          |
| Sonication                   | Ultrasonic           | Elmasonic ultrasonic bath, continuous mode, power 380 W                     | P300H<br>Elma Schmidbauer GmbH, Singen, Germany |  | Sonication of the material as well as used to disperse material on the solution as it decreases the particle size of the material                                                                          |
| Water bath                   | Shaking              | GFL Orbital Shaker 3017                                                     |                                                 |  |                                                                                                                                                                                                            |

Table S3. Summary of DPPH Antioxidant Activity Evaluation.

| Parameter                      | Description                                                                                                      |
|--------------------------------|------------------------------------------------------------------------------------------------------------------|
| Location of Analysis           | Regional Center for Mycology and Biotechnology (RCMB), Al-Azhar University, Egypt.                               |
| Assay Type                     | DPPH (2,2-diphenyl-1-picrylhydrazyl) free radical scavenging assay.                                              |
| Replicates                     | Performed in triplicate and averaged.                                                                            |
| DPPH Solution                  | 0.004% (w/v) DPPH in methanol; stored at 10°C in the dark.                                                       |
| Sample Preparation             | Test compound dissolved in methanol; 40 µL of this solution added to 3 mL DPPH solution.                         |
| Reference Compound             | Ascorbic acid.                                                                                                   |
| Instrument Used                | UV–Visible spectrophotometer (Milton Roy, Spectronic 1201).                                                      |
| Measurement Wavelength         | 515 nm.                                                                                                          |
| Measurement Time               | Absorbance recorded every 1 min for 16 min until stable.                                                         |
| Control                        | Absorbance of DPPH without antioxidant.                                                                          |
| % Inhibition Formula           | $PI = \{[(AC - AT) / AC] \times 100\}$ where AC = control absorbance at t=0, AT = sample absorbance at t=16 min. |
| IC <sub>50</sub> Determination | Calculated from plotted dose-response curve.                                                                     |

Table S4. Cytotoxicity evaluation for MCF-7 and HepG-2.

| Parameter             | Description                                                                                                                                     |
|-----------------------|-------------------------------------------------------------------------------------------------------------------------------------------------|
| Location of Analysis  | Regional Center for Mycology and Biotechnology (RCMB), Al-Azhar University, Egypt.                                                              |
| Cell Lines Used       | MCF-7 (human breast carcinoma), HepG-2 (human liver carcinoma).                                                                                 |
| Source                | American Type Culture Collection (ATCC, Rockville, MD)                                                                                          |
| Chemicals & Reagents  | DMSO, MTT, Trypan blue (Sigma, USA); RPMI-1640, HEPES buffer, L-glutamine, gentamycin, 0.25% Trypsin-EDTA, Fetal Bovine Serum (Lonza, Belgium). |
| Culture Medium        | RPMI-1640 medium supplemented with 10% inactivated fetal calf serum and 50 µg/mL gentamycin.                                                    |
| Incubation Conditions | Maintained at 37°C in a humidified atmosphere with 5% CO <sub>2</sub> ; subcultured 2–3 times per week.                                         |
| Plating Density       | $5 \times 10^4$ cells per well in 96-well plates.                                                                                               |
| Treatment Setup       | Tested compounds added in 8 concentrations; each concentration in triplicates.                                                                  |
| Controls              | Six vehicle controls per plate using media or 0.5% DMSO.                                                                                        |
| Viability Assay       | Cell viability determined using MTT assay after 24 hours incubation.                                                                            |
| MTT Procedure         | Replace media with 100 µL RPMI-1640 (no phenol red) + 10 µL MTT (12 mM); incubate 4 h at 37°C/5% CO <sub>2</sub> .                              |
| Solubilization        | Remove 85 µL media, add 50 µL DMSO, mix, and incubate 10 min at                                                                                 |

|                            |                                                                                      |
|----------------------------|--------------------------------------------------------------------------------------|
| Step                       | 37°C.                                                                                |
| Measurement                | Optical density measured at 590 nm using a SunRise TECAN microplate reader.          |
| Cell Viability Calculation | $\text{Viability (\%)} = (\text{OD}_t / \text{OD}_c) \times 100$                     |
| Data Interpretation        | Dose–response plotted and IC <sub>50</sub> calculated using GraphPad Prism software. |

Table S5. Cytotoxicity Evaluation Table for A-431.

| Parameter                    | Description                                                                                                                                     |
|------------------------------|-------------------------------------------------------------------------------------------------------------------------------------------------|
| Location of Analysis         | Regional Center for Mycology and Biotechnology (RCMB), Al-Azhar University, Egypt.                                                              |
| Cell Line Used               | A-431 cells (human skin carcinoma cell line).                                                                                                   |
| Source                       | American Type Culture Collection (ATCC, Rockville, MD).                                                                                         |
| Chemicals & Reagents         | DMSO, MTT, trypan blue (Sigma, USA); RPMI-1640, HEPES buffer, L-glutamine, gentamycin, 0.25% Trypsin-EDTA, Fetal Bovine Serum (Lonza, Belgium). |
| Culture Medium               | RPMI-1640 supplemented with 10% inactivated fetal calf serum and 50 µg/mL gentamycin.                                                           |
| Incubation Conditions        | Maintained at 37°C in a humidified 5% CO <sub>2</sub> atmosphere; subcultured 2–3 times/week.                                                   |
| Sample Preparation           | Nanofiber sample (10 mg) soaked in 1 mL RPMI-1640 medium for 24 h before use.                                                                   |
| Plating Density              | $5 \times 10^4$ cells/well in 96-well plates; incubated 24 h before treatment.                                                                  |
| Treatment Setup              | Tested compounds added in 8 concentrations; each in triplicate.                                                                                 |
| Controls                     | Six vehicle controls per plate using media or 0.5% DMSO .                                                                                       |
| Incubation Period Before MTT | 48 hours after compound addition.                                                                                                               |
| MTT Procedure                | Replace media with 100 µL RPMI-1640 (no phenol red) + 10 µL MTT (12 mM); incubate 4 h at 37°C/5% CO <sub>2</sub> .                              |
| Solubilization Step          | Remove 85 µL media; add 50 µL DMSO; mix and incubate 10 min at 37°C.                                                                            |
| Measurement                  | Optical density measured at 590 nm using SunRise TECAN microplate reader.                                                                       |
| Viability Calculation        | $\% \text{ viability} = (\text{OD}_t / \text{OD}_c) \times 100$                                                                                 |
| Data Interpretation          | Plot survival curve; IC <sub>50</sub> calculated using GraphPad Prism software.                                                                 |

Table S6. True variables, codes, and their BBD levels.

| <b>Code</b> | <b>Variables</b> | <b>-1</b> | <b>0</b> | <b>+1</b> |
|-------------|------------------|-----------|----------|-----------|
| <b>A</b>    | pH               | 5         | 6.2      | 7.4       |
| <b>B</b>    | Temperature (°C) | 25        | 33.5     | 42        |
| <b>C</b>    | Time (h.)        | 5         | 52.5     | 100       |

Table S7. Equations used in this work to fit the data of adsorption experiments.

| Serial | Equation                                 | Nmae                 | Description                                                                                                                                                                                                                                                                                                                                         | Ref. |
|--------|------------------------------------------|----------------------|-----------------------------------------------------------------------------------------------------------------------------------------------------------------------------------------------------------------------------------------------------------------------------------------------------------------------------------------------------|------|
| 1      | $Q_0^{1/3} - Q_t^{1/3} = K_{HC} \cdot t$ | Hixson–Crowell model | $Q_0$ = Initial amount of drug<br>$Q_t$ = Remaining amount of drug at time t<br>$K_{HC}$ = Hixson–Crowell dissolution rate constant<br>t = Time                                                                                                                                                                                                     | [1]  |
| 2      | $Q_t = Q_0 + K_0 \cdot t$                | Zero-Order           | $Q_t$ = Amount of drug released at time ttt<br>$Q_0$ = Initial amount of drug in the solution (often 0)<br>$K_0$ = Zero-order release constant (units: concentration/time)<br>t = Time                                                                                                                                                              | [2]  |
| 3      | $\ln Q_t = \ln Q_0 - K_1 \cdot t$        | First order          | $Q_0$ = Initial amount of drug<br>$Q_t$ = Amount of drug remaining at time ttt<br>$K_1$ = First-order rate constant (1/time)<br>t = Time                                                                                                                                                                                                            | [3]  |
| 4      | $\frac{M_t}{M_\infty} = K \cdot t^n$     | Korsmeyer–Peppas     | $M_t$ = Amount of drug released at time ttt<br>$M_\infty$ = Total amount of drug released at infinite time (i.e., final amount)<br>$\frac{M_t}{M_\infty}$ = Fraction of drug released at time t<br>K = Kinetic constant incorporating structural and geometric characteristics<br>n = Release exponent that indicates the mechanism of drug release | [4]  |
| 5      | $Q_t = K_H \sqrt{t}$                     | Higuchi              | $Q_t$ = Cumulative amount of drug released at time t<br>$K_H$ = Higuchi dissolution constant (units: amount/time <sup>1/2</sup> )<br>t = Time                                                                                                                                                                                                       | [5]  |

Table S8. The parameter of the kinetic models of DOX release from La-MOF nanofiber membrane

| Kinetic model   | Value of parameters     |            |
|-----------------|-------------------------|------------|
| Zero-order      | $K_o$ (h)               | 1.39       |
|                 | Reduced Chi-Sqr         | 675.61915  |
|                 | Residual Sum of Squares | 0.95326    |
|                 | R-Square (COD)          | 0.9087     |
|                 | $R^2$                   | 0.90363    |
| First-order     | $K_F$ ( $h^{-1}$ )      | 0.4        |
|                 | Reduced Chi-Sqr         | 1.40883    |
|                 | Residual Sum of Squares | 0.97737    |
|                 | R-Square (COD)          | 0.95526    |
|                 | $R^2$                   | 0.95277    |
| Hexson-crowell  | $K_{HC}$ ( $h^{-1}$ )   | 0.289      |
|                 | Reduced Chi-Sqr         | 231.45299  |
|                 | Residual Sum of Squares | 0.92608    |
|                 | R-Square (COD)          | 0.85763    |
|                 | $R^2$                   | 0.84972    |
| Kosmeyer-peppas | $K_F$ ( $h^{-1}$ )      | 0.23       |
|                 | n                       | 0.00915    |
|                 | Reduced Chi-Sqr         | 0.2313     |
|                 | Residual Sum of Squares | 0.92608    |
|                 | R-Square (COD)          | 0.85763    |
|                 | $R^2$                   | 0.84972    |
| Higuchi         | $K_H$                   | 1.74       |
|                 | Reduced Chi-Sqr         | 2083.07687 |
|                 | Residual Sum of Squares | 0.92608    |
|                 | R-Square (COD)          | 0.85763    |
|                 | $R^2$                   | 0.84972    |



Table S9. Comparison of different nanocarriers based on MOFs for DOX delivery.

| Materials                                                                                                                  | Drug release                                                  | Cell lines                           | Cell viability           | Concentration | Treatment | Ref  |
|----------------------------------------------------------------------------------------------------------------------------|---------------------------------------------------------------|--------------------------------------|--------------------------|---------------|-----------|------|
| LDH-Fe <sub>3</sub> O <sub>4</sub> /Cu MOF-DOX-CS@CAR<br>CS (chitosan), CAR (carrageenan hydrogel)                         | pH 5.5 / 72h / 60%<br>pH 7.4 / 72h / 23%                      | L929<br>MCF-7                        | 95%<br>50%               | 62.5 µg/mL    | 48h       | [6]  |
| DOX- CS/Fe <sub>3</sub> O <sub>4</sub> /Cu-MOF<br>CS (chitosan)                                                            | pH 4.5 / 96h / 60%<br>pH 7.4 / 96h / 20%                      | MCF-7                                | 65%                      | 16 µg/mL      | 48h       | [7]  |
| CS/DOX@Ti-MOF<br>Cs (chitosan)                                                                                             | pH 6.5 / 48h / 76%<br>pH 7.4 / 48h / 10%                      | MNNG/HOS<br>MDA-MB-231               | 30%<br>20%               | 6 µg/mL       | 48h       | [8]  |
| SiO <sub>2</sub> @Fe <sub>3</sub> O <sub>4</sub> -HA-MIL-100-GQDs-DOX<br>HA (hydroxyapatite), GQDs (graphene quantum dots) | pH 5 / 70h / 67%<br>pH 7.4 / 70h / 29%                        | MCF-7                                | 5%                       | 32 µg/mL      | 72h       | [9]  |
| Alg-DOX-Cu MOF-LDH<br>Alg (alginate)                                                                                       | pH 5 / 72h / 69%<br>pH 6.8 / 72h / 39%<br>pH 7.4 / 72h / 29%  | L929<br>MCF-7                        | 90%<br>10%               | 60 µg/mL      | 48h       | [10] |
| UiO-66 @P @ DOX<br>P (porphyrin)                                                                                           | pH 4.5/ 200h /90%<br>pH 5.5 / 200h /70%<br>pH 7.4 / 200h /85% | HEK-293<br>HT-29<br>MCF-7<br>MCF-10A | 40%<br>60%<br>20%<br>60% | 50 µg/mL      | 48h       | [11] |

|                                                                           |                        |         |      |            |     |            |
|---------------------------------------------------------------------------|------------------------|---------|------|------------|-----|------------|
| UiO-66 @P @ DOX@RO<br>P (porphyrin), RO ( <i>Rosmarinus officinalis</i> ) | pH 4.5 / 200h / 40%    | HEK-293 | 80%  | 50 µg/mL   | 48h | [11]       |
|                                                                           |                        | HT-29   | 80%  |            |     |            |
|                                                                           | pH 5.5 / 200h / 60%    | MCF-7   | 65%  |            |     |            |
|                                                                           | pH 7.4 / 200h / 50%    | MCF-10A | 80%  |            |     |            |
| A520@L@DOX                                                                | pH 4.5/ 200h / 94%     | HEK-293 | 95%  | 50 µg/mL   | 48h | [12]       |
|                                                                           |                        | HeLa    | 65%  |            |     |            |
|                                                                           | pH 5.5 / 200h / 97%    | MCF-7   | 76%  |            |     |            |
|                                                                           | pH 7.4 / 200h / 96%    | PC12    | 70%  |            |     |            |
| A520@L@DOX@L                                                              | pH 4.5 / 150h / 36%    | HEK-293 | 96%  | 50 µg/mL   | 48h | [12]       |
|                                                                           |                        | HeLa    | 90%  |            |     |            |
|                                                                           | pH 5.5 / 150h / 49%    | MCF-7   | 90%  |            |     |            |
|                                                                           | pH 7.4 / 150h / 88%    | PC12    | 83%  |            |     |            |
| DOX@La-MOF nanofiber membrane                                             | pH 5 / 10h / 94.9%     | HepG-2  | 95.2 | 94.6 µg/mL | 50  | This study |
|                                                                           |                        | A431    | 98.4 |            |     |            |
|                                                                           | pH 6.2 / 100h / 78.8%  |         |      |            |     |            |
|                                                                           | pH 7.4 / 100h / 53.48% |         |      |            |     |            |

Table S10. Using different MOFs with different coating agents on different cell lines.

| MOFs             | Coating agents                               | Cell lines          | Ref  |
|------------------|----------------------------------------------|---------------------|------|
| Silver-Based MOF | Chitosan                                     | L929                | [13] |
| BioMOF           | Chitosan                                     | HUVEC               | [14] |
| UiO-66           | Fe <sub>3</sub> O <sub>4</sub> Nanoparticles | HeLa, NIH/3T3       | [15] |
| UiO-66           | Aloe vera Biopolymer                         | HFFF2               | [16] |
| UiO-66           | PEG                                          | MCF-7               | [17] |
| UiO-68           | Aptamer                                      | MDA-MB-23 , MCF-10A | [18] |

|                               |                                    |                             |            |
|-------------------------------|------------------------------------|-----------------------------|------------|
| Cu-MOF                        | L-lysine                           | MCF-7 , MCF-10A             | [19]       |
| Cu-MOF                        | Aptamer                            | Aptamer                     | [20]       |
| MIL-100(Fe)                   | Silica                             | MCF-7 , MCF-10A             | [21]       |
| MIL-100(Fe)                   | PEG                                | MCF-7                       | [22]       |
| ZIF-8                         | Chitosan & Folic acid              | MCF-7                       | [23]       |
| MIL-88B                       | Chitosan & Folic acid              | M109                        | [24]       |
| Ni/Ta-MOF                     | Chitosan & Folic acid              | MCF-7 , HepG2               | [25]       |
| Zn-N-MOF                      | Chitosan & Folic acid              | HCT116                      | [26]       |
| MOF-5                         | Chitosan & Alginate                | HEK-293 , PC12 , HepG2      | [27]       |
| MOF-5                         | Carboxymethylcellulose,<br>Aptamer | HeLa , 4TA                  | [28]       |
| UiO-66-NH <sub>2</sub>        | Porphyrin                          | MCF-7 , HT-29               | [11]       |
| beta- CD-MOF                  | Glutamine                          | MCF-7 , AGS                 | [29]       |
| Bio-MOF-11                    | Pectin Biopolymer                  | SW489                       | [30]       |
| Fe-BTC MOF                    | Liposome                           | MCF-7                       | [31]       |
| A520                          | Tp Extract                         | MCF-7 , HeLa, HEK-293, PC12 | [12]       |
| DOX@La-MOF nanofiber membrane | Chitosan and polycaprolactone      | HepG-2, A431                | This study |

## References

- [1] K. Ramteke, P. Dighe, A. Kharat, S. Patil, Mathematical models of drug dissolution: A review, *Sch. Acad. J. Pharm*, 3 (2014) 388-396.
- [2] B. Narasimhan, R. Langer, Zero-order release of micro-and macromolecules from polymeric devices: the role of the burst effect, *Journal of controlled release*, 47 (1997) 13-20.
- [3] N. Mulye, S. Turco, A simple model based on first order kinetics to explain release of highly water soluble drugs from porous dicalcium phosphate dihydrate matrices, *Drug development and industrial pharmacy*, 21 (1995) 943-953.
- [4] A. Talevi, M.E. Ruiz, Korsmeyer-Peppas, Peppas-Sahlin, and Brazel-Peppas: Models of drug release, *The ADME Encyclopedia: A Comprehensive Guide on Biopharmacy and Pharmacokinetics*, Springer2022, pp. 613-621.
- [5] D. Paul, Elaborations on the Higuchi model for drug delivery, *International journal of pharmaceutics*, 418 (2011) 13-17.
- [6] A. Taghikhani, M. Babazadeh, S. Davaran, E. Ghasemi, Facile preparation of a pH-sensitive biocompatible nanocarrier based on magnetic layered double hydroxides/Cu MOFs-chitosan crosslinked κ-carrageenan for controlled doxorubicin delivery to breast cancer cells, *Colloids and Surfaces B: Biointerfaces*, 243 (2024) 114122.

- [7] M. Abbasian, M. Khayyatalimohammadi, In-situ forming Cu-based metal-organic framework in the presence of chitosan-Fe<sub>3</sub>O<sub>4</sub> nanohybrids: A pH-sensitive carrier for controlled release of doxorubicin, *International Journal of Biological Macromolecules*, 278 (2024) 134224.
- [8] Y. Zeng, J. Yuan, Z. Ran, X. Zhan, X. Li, H. Ye, J. Dong, G. Cao, Z. Pan, Y. Bao, Chitosan/NH<sub>2</sub>-MIL-125 (Ti) scaffold loaded with doxorubicin for postoperative bone tumor clearance and osteogenesis: An in vitro study, *International Journal of Biological Macromolecules*, 263 (2024) 130368.
- [9] S. Karimi, V. Zeyni, H. Namazi, A fluorescent system based on graphene quantum dots-capped magnetic hydroxyapatite-MIL-100 metal-organic frameworks for pH-sensitive and controlled release of DOX, *Diamond and Related Materials*, 140 (2023) 110502.
- [10] S. Karimi, H. Rasuli, R. Mohammadi, Facile preparation of pH-sensitive biocompatible alginate beads having layered double hydroxide supported metal-organic framework for controlled release from doxorubicin to breast cancer cells, *International Journal of Biological Macromolecules*, 234 (2023) 123538.
- [11] S. Ahmadi, V. Jajarmi, M. Ashrafizadeh, A. Zarrabi, J.T. Haponiuk, M.R. Saeb, E.C. Lima, M. Rabiee, N. Rabiee, Mission impossible for cellular internalization: When porphyrin alliance with UiO-66-NH<sub>2</sub> MOF gives the cell lines a ride, *Journal of Hazardous Materials*, 436 (2022) 129259.
- [12] H. Daneshgar, M. Bagherzadeh, S. Sojdeh, M. Safarkhani, M. Edrisi, A. Ojaghi, S. Ahmadi, M. Kiani, N. Rabiee, Discovery of valley-hill structures on the surface of MOFs: Enhancing DOX diffusion and release through nature-made channels, *Nano Materials Science*, (2024).
- [13] S.M. Dehnavi, M. Barjasteh, S.A. Seyedkhani, S.Y. Rahnamaee, R. Bagheri, A novel silver-based metal-organic framework incorporated into nanofibrous chitosan coatings for bone tissue implants, *International Journal of Pharmaceutics*, 640 (2023) 123047.
- [14] R. Abazari, A.R. Mahjoub, F. Ataei, A. Morsali, C.L. Carpenter-Warren, K. Mehdizadeh, A.M. Slawin, Chitosan immobilization on bio-MOF nanostructures: a biocompatible pH-responsive nanocarrier for doxorubicin release on MCF-7 cell lines of human breast cancer, *Inorganic Chemistry*, 57 (2018) 13364-13379.
- [15] H.-X. Zhao, Q. Zou, S.-K. Sun, C. Yu, X. Zhang, R.-J. Li, Y.-Y. Fu, Theranostic metal-organic framework core-shell composites for magnetic resonance imaging and drug delivery, *Chemical science*, 7 (2016) 5294-5301.
- [16] H. Nabipour, S. Rohani, Zirconium metal organic framework/aloe vera carrier loaded with naproxen as a versatile platform for drug delivery, *Chemical Papers*, 77 (2023) 3461-3470.
- [17] V. Gupta, S. Mohiyuddin, A. Sachdev, P. Soni, P. Gopinath, S. Tyagi, PEG functionalized zirconium dicarboxylate MOFs for docetaxel drug delivery in vitro, *Journal of Drug Delivery Science and Technology*, 52 (2019) 846-855.
- [18] W.-H. Chen, X. Yu, A. Cecconello, Y.S. Sohn, R. Nechushtai, I. Willner, Stimuli-responsive nucleic acid-functionalized metal-organic framework nanoparticles using pH- and metal-ion-dependent DNazymes as locks, *Chemical science*, 8 (2017) 5769-5780.
- [19] M.R. Moghadam, S. Karimi, H. Namazi, A targeted biosystem based on l-lysine coated GO@ rod-Cu (II) metal-organic frameworks for pH-controlled co-delivery of doxorubicin and curcumin, *Food Bioscience*, 58 (2024) 103578.
- [20] M. Falsafi, M. Zahiri, A.S. Saljooghi, K. Abnous, S.M. Taghdisi, A. Sazgarnia, M. Ramezani, M. Alibolandi, Aptamer targeted red blood cell membrane-coated porphyrinic copper-based MOF for guided photochemotherapy against metastatic breast cancer, *Microporous and Mesoporous Materials*, 325 (2021) 111337.

- [21] F. Parsa, M. Setoodehkhah, S.M. Atyabi, Loading and release study of ciprofloxacin from silica-coated magnetite modified by iron-based metal-organic framework (MOF) as a noncarrier in targeted drug delivery system, *Inorganic Chemistry Communications*, 155 (2023) 111056.
- [22] P. Yadav, S. Kumari, A. Yadav, P. Bhardwaj, M. Maruthi, A. Chakraborty, P. Kanoo, Biocompatible Drug Delivery System Based on a MOF Platform for a Sustained and Controlled Release of the Poorly Soluble Drug Norfloxacin, *ACS omega*, 8 (2023) 28367-28375.
- [23] M. Ghaderpour, S. Kashanian, M. Nazari, M. Motiei, S. Sajadimajd, Targeted Delivery of Letrozole Using a Modified Metal–Organic Framework as a Promising Candidate in Breast Cancer Therapy, *BioNanoScience*, (2024) 1-14.
- [24] S. Dehghani, M. Hosseini, S. Haghgoo, V. Changizi, H. Akbari Javar, M. Khoobi, N. Riahi Alam, Multifunctional MIL-Cur@ FC as a theranostic agent for magnetic resonance imaging and targeting drug delivery: in vitro and in vivo study, *Journal of drug targeting*, 28 (2020) 668-680.
- [25] S.-s. Jalaladdiny, A. Badoei-dalfard, Z. Karami, G. Sargazi, Co-delivery of doxorubicin and curcumin to breast cancer cells by a targeted delivery system based on Ni/Ta core-shell metal-organic framework coated with folic acid-activated chitosan nanoparticles, *Journal of the Iranian Chemical Society*, 19 (2022) 4287-4298.
- [26] Z. Khatibi, N.M. Kazemi, S. Khaleghi, Targeted and biocompatible NMOF as efficient nanocomposite for delivery of methotrexate to colon cancer cells, *Journal of Drug Delivery Science and Technology*, 73 (2022) 103441.
- [27] N. Rabiee, M. Bagherzadeh, M. Jouyandeh, P. Zarrintaj, M.R. Saeb, M. Mozafari, M. Shokouhimehr, R.S. Varma, Natural polymers decorated MOF-MXene nanocarriers for co-delivery of doxorubicin/pCRISPR, *ACS applied bio materials*, 4 (2021) 5106-5121.
- [28] S. Javanbakht, A. Hemmati, H. Namazi, A. Heydari, Carboxymethylcellulose-coated 5-fluorouracil@ MOF-5 nano-hybrid as a bio-nanocomposite carrier for the anticancer oral delivery, *International journal of biological macromolecules*, 155 (2020) 876-882.
- [29] P. Sadeh, S. Zeinali, B. Rastegari, I. Najafipour, Functionalization of  $\beta$ -cyclodextrin metal-organic frameworks with gelatin and glutamine for drug delivery of curcumin to cancerous cells, *Heliyon*, 10 (2024).
- [30] H. Nabipour, Y. Hu, Development of fully bio-based pectin/curcumin@ bio-MOF-11 for colon specific drug delivery, *Chemical Papers*, 76 (2022) 2969-2979.
- [31] A. Karami, A. Ahmed, R. Sabouni, G.A. Husseini, M. Al Sharabati, N. AlSawaftah, V. Paul, Hybrid liposome/metal–organic framework as a promising dual-responsive nanocarriers for anticancer drug delivery, *Colloids and Surfaces B: Biointerfaces*, 217 (2022) 112599.
